# Supplementary material for: Identifying successful combinations by fertility index in old garden roses and hybrid tea roses crosses
Source: PeerJ. 2023 Jun 19;11:e15526. doi: 10.7717/peerj.15526 (PMC10286800; doi:10.7717/peerj.15526)
Supplement: Supplemental Information 1 [file peerj-11-15526-s001.xlsx]

## Sheet: Figure 1-Viability-germin
pollen parent	Code	Replicate	pollen viability	pollen germination
Cabbage Rose	1	1	40.75	29.94
Cabbage Rose	1	2	51.63	31.26
Cabbage Rose	1	3	49.29	36.9
Black rose	2	1	48.39	45.67
Black rose	2	2	49.96	41.47
Black rose	2	3	50.56	45.51
Jumilia	3	1	41.19	11.53
Jumilia	3	2	39.28	16.1
Jumilia	3	3	38.21	19.31
First Red	4	1	52.38	27.43
First Red	4	2	53.78	29.41
First Red	4	3	49.76	21.87
Magnum	5	1	41.57	22.32
Magnum	5	2	49.5	19.82
Magnum	5	3	48.33	24.27

## Sheet: Figure 2-PCA analysis
	Seed Parent	Pollen Parent	crossability rate	Seed Number per fruit	Fruit weight	seed weight	seed germination rate	Seed production efficiency	pollen germination	Stigma Number
1	Jumilia	magnum	11.6797	2.12143	2.77255	33.48	47.7255	0.183539	22.1367	135
2	Jumilia	black rose	56.7194	9.56	14.5973	64.2	8.78261	4.02778	45.67	135
3	Jumilia	cabbage rose	55.8889	9.12	7.61911	38.33	30.6892	3.77572	29.24	135
4	Jumilia	first red	8.69732	3.46	3.65	48.44	20.9767	0.219725	27.43	135
5	magnum	jumilia	56.1905	12.4	5.98228	51.72	31.7105	4.28373	11.53	160
6	magnum	black rose	32	16.51	5.45249	47.4	36.8422	3.27639	41.47	160
7	magnum	cabbage rose	50	17.45	8.36	88.06	31.6621	5.24715	31.26	160
8	magnum	first red	12.5222	7.19	3.92191	48.86	36.7255	0.514757	29.41	160
9	first red	jumilia	48.5402	11.09	6.38	73.24	19.7	1.34073	16.1	400
10	first red	magnum	46.9658	8.29	3.81	75.38	13.4207	0.953419	19.82	400
11	first red	black rose	36.6111	11.62	9.33	61.5	33.9396	1.04778	45.51	400
12	first red	cabbage rose	46.1026	19.31	10.29	56.23	31.3781	2.22949	36.9	400
13	Black rose	jumilia	90.7481	7.59	4.2	39.41	39.0833	17.2037	19.31	40
14	Black rose	magnum	76.9474	4.53	3.78	38.98	33.3533	8.6731	22.32	40
15	Black rose	cabbage rose	68.8111	5.84	3.56	57.44	36.4	10.0053	32.7	40
16	Black rose	first red	94.358	8.54	4.35	31.66	41.7325	19.4646	21.87	40
17	Cabbage rose	jumilia	80	6.42	2.67	51.19	9.14424	2.85657	15.65	175
18	Cabbage rose	magnum	23.1188	9.6	3.52	52.54	16.6123	1.26017	24.27	175
19	Cabbage rose	black rose	60	5.31	3.2	74.67	12.7937	1.79524	44.22	175
20	Cabbage rose	first red	65.8582	9.8	3.06	61.46	14.2095	3.68758	26.24	175

## Sheet: XLSTAT_20230317_145123_1_HID
JxM	11.6797	2.12143	2.77255	33.48	47.7255	0.183539
JxBR	56.7194	9.56	14.5973	64.2	8.78261	4.02778
JxCR	55.8889	9.12	7.61911	38.33	30.6892	3.77572
JxFR	8.69732	3.46	3.65	48.44	20.9767	0.219725
MxJ	56.1905	12.4	5.98228	51.72	31.7105	4.28373
MxBR	32	16.51	5.45249	47.4	36.8422	3.27639
MxCR	50	17.45	8.36	88.06	31.6621	5.24715
MxFR	12.5222	7.19	3.92191	48.86	36.7255	0.514757
FRxJ	48.5402	11.09	6.38	73.24	19.7	1.34073
FRxM	46.9658	8.29	3.81	75.38	13.4207	0.953419
FRxBR	36.6111	11.62	9.33	61.5	33.9396	1.04778
FRxCR	46.1026	19.31	10.29	56.23	31.3781	2.22949
BRxJ	90.7481	7.59	4.2	39.41	39.0833	17.2037
BRxM	76.9474	4.53	3.78	38.98	33.3533	8.6731
BRxCR	68.8111	5.84	3.56	57.44	36.4	10.0053
BRxFR	94.358	8.54	4.35	31.66	41.7325	19.4646
CRxJ	80	6.42	2.67	51.19	9.14424	2.85657
CRxM	23.1188	9.6	3.52	52.54	16.6123	1.26017
CRxBR	60	5.31	3.2	74.67	12.7937	1.79524
CRxFR	65.8582	9.8	3.06	61.46	14.2095	3.68758

## Sheet: Figure 3 heat map
	Seed Parent	Pollen Parent	crossability rate	Seed Number per fruit	Fruit weight	seed weight	seed germination rate	Seed production efficiency	pollen germination	Stigma Number
1	Jumilia	magnum	11.6797	2.12143	2.77255	33.48	47.7255	0.183539	22.1367	135
2	Jumilia	black rose	56.7194	9.56	14.5973	64.2	8.78261	4.02778	45.67	135
3	Jumilia	cabbage rose	55.8889	9.12	7.61911	38.33	30.6892	3.77572	29.24	135
4	Jumilia	first red	8.69732	3.46	3.65	48.44	20.9767	0.219725	27.43	135
5	magnum	jumilia	56.1905	12.4	5.98228	51.72	31.7105	4.28373	11.53	160
6	magnum	black rose	32	16.51	5.45249	47.4	36.8422	3.27639	41.47	160
7	magnum	cabbage rose	50	17.45	8.36	88.06	31.6621	5.24715	31.26	160
8	magnum	first red	12.5222	7.19	3.92191	48.86	36.7255	0.514757	29.41	160
9	first red	jumilia	48.5402	11.09	6.38	73.24	19.7	1.34073	16.1	400
10	first red	magnum	46.9658	8.29	3.81	75.38	13.4207	0.953419	19.82	400
11	first red	black rose	36.6111	11.62	9.33	61.5	33.9396	1.04778	45.51	400
12	first red	cabbage rose	46.1026	19.31	10.29	56.23	31.3781	2.22949	36.9	400
13	Black rose	jumilia	90.7481	7.59	4.2	39.41	39.0833	17.2037	19.31	40
14	Black rose	magnum	76.9474	4.53	3.78	38.98	33.3533	8.6731	22.32	40
15	Black rose	cabbage rose	68.8111	5.84	3.56	57.44	36.4	10.0053	32.7	40
16	Black rose	first red	94.358	8.54	4.35	31.66	41.7325	19.4646	21.87	40
17	Cabbage rose	jumilia	80	6.42	2.67	51.19	9.14424	2.85657	15.65	175
18	Cabbage rose	magnum	23.1188	9.6	3.52	52.54	16.6123	1.26017	24.27	175
19	Cabbage rose	black rose	60	5.31	3.2	74.67	12.7937	1.79524	44.22	175
20	Cabbage rose	first red	65.8582	9.8	3.06	61.46	14.2095	3.68758	26.24	175

## Sheet: Table 1-Petal-Stigma number-DNA
Seed Parent	Code	Replicate	Stigma Number	Petal Number	DNA content
Jumilia	1	1	135	42	2.3
Jumilia	1	2	135	45	2.33
Jumilia	1	3	135	48	2.36
Magnum	2	1	160	32	2.52
Magnum	2	2	160	30	2.54
Magnum	2	3	160	28	2.56
First Red	3	1	400	31	2.35
First Red	3	2	400	35	2.36
First Red	3	3	400	39	2.37
Black rose	4	1	40	22	2.41
Black rose	4	2	40	25	2.44
Black rose	4	3	40	28	2.47
Cabbage rose	5	1	175	41	2.41
Cabbage rose	5	2	175	45	2.43
Cabbage rose	5	3	175	49	2.45

## Sheet: Table 3-Crossability indices
Seed Parent	Pollen Parent	Combination Code	Crossability Rate (%)	Seed Set per Fruit	Fruit Weight (g)	Seed Weight (mg)	Seed Germination (%)	Seed Production Efficiency (SPE)
Jumilia	Magnum	1	10.1765	1.96532	2.94	36.0192	48.1588	0.148148
Jumilia	Magnum	1	13.098	1.98503	2.52	31.2427	45.9588	0.192593
Jumilia	Magnum	1	11.7647	2.40833	2.86	33.1924	49.0588	0.209877
Jumilia	Black rose	2	56.25	9.37037	13.21	61.8577	7.69565	3.90432
Jumilia	Black rose	2	53.9167	8.78671	17.2	83.2014	8.95652	3.50926
Jumilia	Black rose	2	59.9917	10.5084	13.39	47.5413	9.69565	4.66975
Jumilia	Cabbage rose	3	52.2222	8.49149	7.68	33.0011	21.0559	3.28477
Jumilia	Cabbage rose	3	56.5556	10.6316	9.72	41.9976	31.9559	4.45391
Jumilia	Cabbage rose	3	58.8889	8.22642	5.45	40.005	39.0559	3.58848
Jumilia	First Red	4	6.89655	3.90333	4.18	48.5482	24.58	0.199404
Jumilia	First Red	4	8.96552	3.25641	3.64	49.9213	18	0.216262
Jumilia	First Red	4	10.2299	3.21348	3.14	46.8531	20.35	0.243508
Magnum	Jumilia	5	46.7619	14.277	7.09	55.806	29.3832	4.17262
Magnum	Jumilia	5	58.2857	12.9412	6.21	55.9722	35.42	4.71429
Magnum	Jumilia	5	63.5238	9.98501	4.65	43.3784	30.3283	3.96429
Magnum	Black rose	6	32.6667	10.8741	3.61	41.761	38.262	2.22014
Magnum	Black rose	6	30	21.3519	6.6	51.7855	34.2027	4.00347
Magnum	Black rose	6	33.3333	17.3067	6.14	48.6544	38.062	3.60556
Magnum	Cabbage rose	7	63.3333	11.9447	5.44	85.2327	29.989	4.72812
Magnum	Cabbage rose	7	33.3333	19.689	12.63	100.213	31.6983	4.10187
Magnum	Cabbage rose	7	53.3333	20.7344	7	78.734	33.2989	6.91146
Magnum	First Red	8	8.56667	10.6518	4.55	39.726	33.7647	0.570312
Magnum	First Red	8	15.8333	4.5	3.55	66.7836	39.6471	0.445312
Magnum	First Red	8	13.1667	6.42405	3.67	40.0739	36.7647	0.528646
First Red	Jumilia	9	41.6092	11.2541	7.36	55.6477	15	1.17069
First Red	Jumilia	9	54.2529	9.88178	6.21	91.8072	19.24	1.34029
First Red	Jumilia	9	49.7586	12.1483	5.55	72.2782	24.86	1.51121
First Red	Magnum	10	54.8718	6.26168	2.48	66.1704	11.5351	0.858974
First Red	Magnum	10	42.8205	9.89222	4.26	69.8157	10.9135	1.05897
First Red	Magnum	10	43.2051	8.72404	4.69	90.1532	17.8135	0.942308
First Red	Black rose	11	36.6667	9.90909	9.14	67.8571	30.3313	0.908333
First Red	Black rose	11	30	13.9167	10.14	50.0062	42.4433	1.04375
First Red	Black rose	11	43.1667	11.0386	8.73	66.6319	29.0443	1.19125
First Red	Cabbage rose	12	43.4872	16.2146	8.35	60.0608	30.0945	1.76282
First Red	Cabbage rose	12	44.8718	22.4	13.33	54.2749	25.9453	2.51282
First Red	Cabbage rose	12	49.9487	19.3224	9.2	54.3592	38.0945	2.41282
Black rose	Jumilia	13	89.6593	7.97257	4.22	37.6885	35.4166	17.8704
Black rose	Jumilia	13	82.5926	7.44395	5.23	44.4152	41.4166	15.3704
Black rose	Jumilia	13	99.9926	7.34869	3.16	36.1352	40.4166	18.3704
Black rose	Magnum	14	69.614	4.875	4.3	43.6417	27.8333	8.48421
Black rose	Magnum	14	88.9474	4.28008	2.74	33.205	37.3933	9.51754
Black rose	Magnum	14	72.2807	4.43689	4.29	40.0797	34.8333	8.01754
Black rose	Cabbage rose	15	59.8333	6.23955	3.33	63.7433	39.4706	9.33333
Black rose	Cabbage rose	15	71.9333	5.94254	3.34	59.0496	31.7647	10.6867
Black rose	Cabbage rose	15	74.6667	5.35491	4.01	49.5362	37.9647	9.99583
Black rose	First Red	16	73.1111	10.1591	5.25	30.0547	41.5226	18.5685
Black rose	First Red	16	97.7778	9.78144	4.84	32.7207	44.1523	23.9102
Black rose	First Red	16	112.185	5.67462	2.95	32.2026	39.5226	15.9152
Cabbage rose	Jumilia	17	83.3333	5.226	2.41	42.8326	8.19091	2.48857
Cabbage rose	Jumilia	17	63.3333	8.14632	3.47	62.626	8.29091	2.94819
Cabbage rose	Jumilia	17	93.3333	5.87429	2.12	48.108	10.9509	3.13295
Cabbage rose	Magnum	18	21.9231	7.56023	3.4	49.9204	13.7446	0.947106
Cabbage rose	Magnum	18	17.6897	11.2929	4.87	51.8402	16.4465	1.14154
Cabbage rose	Magnum	18	29.7436	9.95431	2.28	55.8503	19.6458	1.69187
Cabbage rose	Black rose	19	50	6.23333	3.16	75.9633	13.6984	1.78095
Cabbage rose	Black rose	19	63.3333	4.51316	3.83	73.5329	13.9841	1.63333
Cabbage rose	Black rose	19	66.6667	5.175	2.61	74.5016	10.6984	1.97143
Cabbage rose	First Red	20	65.1724	9.02646	2.87	58.2302	12.8571	3.36158
Cabbage rose	First Red	20	62.5517	10.1158	3.21	64.6084	12.9857	3.61576
Cabbage rose	First Red	20	69.8506	10.2353	3.11	61.5345	16.7857	4.08539

## Sheet: Table 4-Parents parameters
Parent	Replicate	Average Crossability Rate	Percentage High Crossability	Seed Production Efficency
Jumilia	1	52.06	61.5	6.91
Jumilia	1	50	62	5.25
Jumilia	1	51.13	64	6.3
Magnum	2	38.6	49	9
Magnum	2	37.7	51.5	10.99
Magnum	2	39.7	49.5	9.98
Black rose	3	63.7	48	40.75
Black rose	3	65.4	53	42.55
Black rose	3	64.5	49	41.24
Cabbage rose	4	55.35	50	7.1
Cabbage rose	4	57.8	49	8.2
Cabbage rose	4	55.5	51	6.3
First Red	5	44.2	63.5	4.1
First Red	5	45.8	61.5	3.29
First Red	5	44.88	62.5	5.13

## Sheet: Table 5-Correlation matrix
Seed Parent	Pollen Parent	crossability rate	Seed Number per fruit	Fruit weight	seed weight	seed germination rate	Seed production efficiency	pollen germination	Stigma Number
Jumilia	magnum	11.6797	2.12143	2.77255	33.48	47.7255	0.183539	22.1367	135
Jumilia	black rose	56.7194	9.56	14.5973	64.2	8.78261	4.02778	45.67	135
Jumilia	cabbage rose	55.8889	9.12	7.61911	38.33	30.6892	3.77572	29.24	135
Jumilia	first red	8.69732	3.46	3.65	48.44	20.9767	0.219725	27.43	135
magnum	jumilia	56.1905	12.4	5.98228	51.72	31.7105	4.28373	11.53	160
magnum	black rose	32	16.51	5.45249	47.4	36.8422	3.27639	41.47	160
magnum	cabbage rose	50	17.45	8.36	88.06	31.6621	5.24715	31.26	160
magnum	first red	12.5222	7.19	3.92191	48.86	36.7255	0.514757	29.41	160
first red	jumilia	48.5402	11.09	6.38	73.24	19.7	1.34073	16.1	400
first red	magnum	46.9658	8.29	3.81	75.38	13.4207	0.953419	19.82	400
first red	black rose	36.6111	11.62	9.33	61.5	33.9396	1.04778	45.51	400
first red	cabbage rose	46.1026	19.31	10.29	56.23	31.3781	2.22949	36.9	400
Black rose	jumilia	90.7481	7.59	4.2	39.41	39.0833	17.2037	19.31	40
Black rose	magnum	76.9474	4.53	3.78	38.98	33.3533	8.6731	22.32	40
Black rose	cabbage rose	68.8111	5.85	3.56	57.44	36.4	10.0053	32.7	40
Black rose	first red	94.358	8.54	4.35	31.66	41.7325	19.4646	21.87	40
Cabbage rose	jumilia	80	6.42	2.67	51.19	9.14424	2.85657	15.65	175
Cabbage rose	magnum	23.1188	9.6	3.52	52.54	16.6123	1.26017	24.27	175
Cabbage rose	black rose	60	5.31	3.2	74.67	12.7937	1.79524	44.22	175
Cabbage rose	first red	65.8582	9.79	3.06	61.46	14.2095	3.68758	26.24	175
